# Supplementary material
Source: MDPI journal article supplement (https://www.mdpi.com/2073-4441/15/14/2620)
Supplement: s1 [file s1]

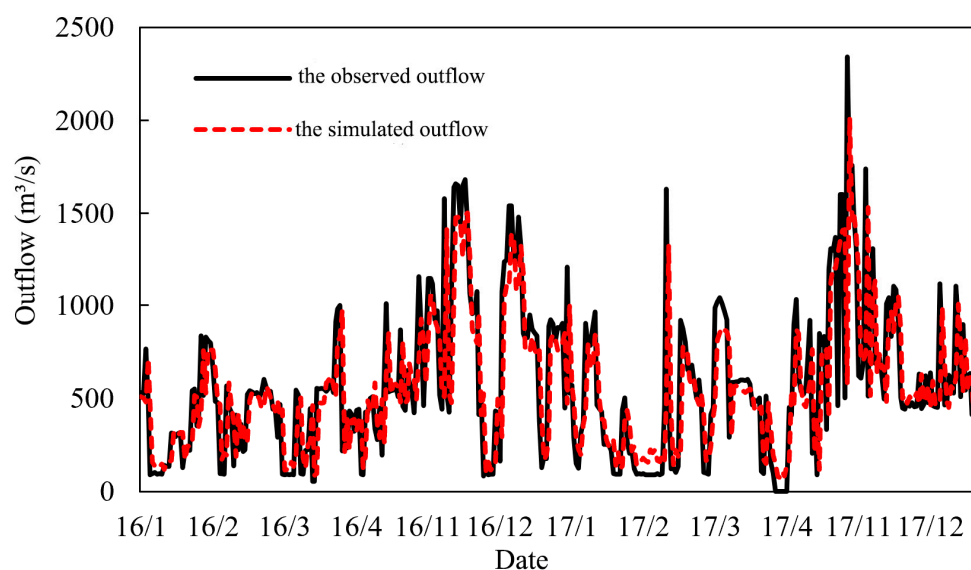

**Figure S1.** Outflow of Jin'anqiao reservoir simulated by linear regression in non-flood season (2016 – 2017)

**Table S1.** Results of fitting the reservoir outflow based on dispatch function.

| Reservoir  | Accuracy              | Flood season |            | Non-flood season |            |
|------------|-----------------------|--------------|------------|------------------|------------|
|            |                       | Calibration  | Validation | Calibration      | Validation |
| Ertan      | <i>NSE</i>            | 0.89         | 0.92       | 0.77             | 0.84       |
|            | <i>R</i> <sup>2</sup> | 0.89         | 0.92       | 0.77             | 0.85       |
|            | <i>PBIAS</i> (%)      | 0            | −0.73      | 0                | −2.69      |
| Jinping I  | <i>NSE</i>            | 0.86         | 0.91       | 0.95             | 0.86       |
|            | <i>R</i> <sup>2</sup> | 0.86         | 0.92       | 0.95             | 0.87       |
|            | <i>PBIAS</i> (%)      | 0            | 2.22       | 0                | 0.16       |
| Liyuan     | <i>NSE</i>            | 0.98         | 0.98       | 0.83             | 0.81       |
|            | <i>R</i> <sup>2</sup> | 0.98         | 0.98       | 0.83             | 0.81       |
|            | <i>PBIAS</i> (%)      | 0.00         | −0.12      | 0.00             | 0.37       |
| Jin'anqiao | <i>NSE</i>            | 0.96         | 0.90       | 0.76             | 0.51       |
|            | <i>R</i> <sup>2</sup> | 0.96         | 0.91       | 0.76             | 0.53       |
|            | <i>PBIAS</i> (%)      | 0.00         | 4.61       | 0.00             | 3.18       |
| Guanyinyan | <i>NSE</i>            | 0.92         | 0.95       | 0.83             | 0.80       |
|            | <i>R</i> <sup>2</sup> | 0.92         | 0.95       | 0.83             | 0.80       |
|            | <i>PBIAS</i> (%)      | 0.00         | 0.25       | 0.00             | −2.25      |
| Xiluodu    | <i>NSE</i>            | 0.89         | 0.93       | 0.81             | 0.82       |
|            | <i>R</i> <sup>2</sup> | 0.89         | 0.93       | 0.81             | 0.83       |
|            | <i>PBIAS</i> (%)      | 0.00         | 2.75       | 0.00             | −0.74      |

|            |                       |      |       |      |       |
|------------|-----------------------|------|-------|------|-------|
| Xiangjiaba | <i>NSE</i>            | 0.94 | 0.95  | 0.91 | 0.88  |
|            | <i>R</i> <sup>2</sup> | 0.94 | 0.97  | 0.91 | 0.90  |
|            | <i>PBIAS</i> (%)      | 0.00 | −4.90 | 0.00 | −3.08 |

**Table S2.** Simulation accuracy of different reservoir algorithms for inflow and outflow of seven reservoirs in the Jinsha River basin

| Simulation performance |         | Target storage capacity method |                       |                  | Without considering the reservoir influence |                       |                  | Dispatch function method |                       |                  |
|------------------------|---------|--------------------------------|-----------------------|------------------|---------------------------------------------|-----------------------|------------------|--------------------------|-----------------------|------------------|
|                        |         | <i>NSE</i>                     | <i>R</i> <sup>2</sup> | <i>PBIAS</i> (%) | <i>NSE</i>                                  | <i>R</i> <sup>2</sup> | <i>PBIAS</i> (%) | <i>NSE</i>               | <i>R</i> <sup>2</sup> | <i>PBIAS</i> (%) |
| Jinping I              | inflow  | 0.73                           | 0.79                  | −3.5             | 0.73                                        | 0.79                  | −3.5             | 0.73                     | 0.79                  | −3.5             |
|                        | outflow | −2.04                          | 0.24                  | −7.0             | −0.21                                       | 0.45                  | −8.6             | 0.45                     | 0.58                  | −7.9             |
| Ertan                  | inflow  | 0.09                           | 0.47                  | 0.1              | 0.54                                        | 0.64                  | −2.1             | 0.71                     | 0.72                  | 0.2              |
|                        | outflow | −0.78                          | 0.24                  | −3.2             | 0.52                                        | 0.58                  | −5.4             | 0.67                     | 0.68                  | −3.1             |
| Liyuan                 | inflow  | 0.82                           | 0.88                  | −5.7             | 0.82                                        | 0.88                  | −5.7             | 0.82                     | 0.88                  | −5.7             |
|                        | outflow | 0.69                           | 0.81                  | −5.8             | 0.81                                        | 0.88                  | −5.7             | 0.82                     | 0.88                  | −5.8             |
| Jin'anqiao             | inflow  | 0.82                           | 0.85                  | −7.9             | 0.83                                        | 0.86                  | −8.2             | 0.83                     | 0.86                  | −7.9             |
|                        | outflow | 0.66                           | 0.74                  | −9.2             | 0.82                                        | 0.85                  | −9.6             | 0.82                     | 0.85                  | −9.3             |
| Guanyin<br>yan         | inflow  | 0.66                           | 0.81                  | −24.8            | 0.68                                        | 0.82                  | −25.2            | 0.67                     | 0.82                  | −25              |
|                        | outflow | 0.52                           | 0.74                  | −18.7            | 0.65                                        | 0.80                  | −19.3            | 0.66                     | 0.80                  | −18.8            |
| Xiluodu                | inflow  | 0.57                           | 0.75                  | −1.8             | 0.77                                        | 0.85                  | −2.2             | 0.86                     | 0.89                  | −1.0             |
|                        | outflow | 0.04                           | 0.57                  | −14.6            | 0.47                                        | 0.72                  | −2.4             | 0.72                     | 0.77                  | −1.7             |
| Xiangjia<br>ba         | inflow  | 0.13                           | 0.56                  | −10.6            | 0.62                                        | 0.75                  | −13.7            | 0.76                     | 0.79                  | −11.0            |
|                        | outflow | 0.18                           | 0.60                  | 0.6              | 0.60                                        | 0.75                  | −1.9             | 0.71                     | 0.75                  | 0.6              |

**Table S3.** Typical GCMs under two RCPs and their spatial Resolution

| Climate models | RCP4.5       |                    | RCP8.5        |                    |
|----------------|--------------|--------------------|---------------|--------------------|
|                | Typical GCMs | Spatial Resolution | Typical GCMs  | Spatial Resolution |
| Cold-dry       | IPSL-CM5B-LR | 3.75°×1.90°        | CSIRO-Mk3-6-0 | 1.875°×1.875°      |
| Cold-wet       | GFDL-ESM2M   | 2.5°×2.0°          | CCSM4         | 1.25°×0.94°        |
| Warm-dry       | CMCC-CM      | 0.75°×0.75°        | CSIRO-Mk3-6-0 | 1.875°×1.875°      |
| Warm-wet       | BNU-ESM      | 2.8°×2.8°          | MIROC-ESM     | 2.8°×2.8°          |
